# Supplementary material for: Construction of a short metallofullerene-peapod with a spin probe
Source: Royal Society of Chemistry journal article supplement (doi:10.1039/c9cc05220h), 2019-01-01
Supplement: c9cc05220h1.pdf [file c9cc05220h1.pdf]

here the Grimme's DFT-D3 method provides an empirical dispersion correction. The above calculations were using the Gaussian 09 quantum chemical program package. The structures and isosurfaces were visualized with GaussView. The simulations of the EPR spectra were carried out by the EasySpin package (<http://www.easyspin.org>) on the Matlab platform.

1. D. Lu, G. Zhuang, H. Wu, S. Wang, S. Yang and P. Du, *Angewandte Chemie*, 2017, **129**, 164-168.
